# Supplementary material for: Biodegradable metal-organic framework MIL-88A for triboelectric nanogenerator
Source: PubMed Central journal article supplement — iScience. 2021 Jan 18;24(2):102064. doi: 10.1016/j.isci.2021.102064 (PMC7859291; doi:10.1016/j.isci.2021.102064), 2021-01-18
Supplement: mmc1.pdf [file mmc1.pdf]

iScience, Volume 24

## **Supplemental Information**

**Biodegradable metal-organic framework**

**MIL-88A for triboelectric nanogenerator**

**Gaurav Khandelwal, Nirmal Prashanth Maria Joseph Raj, Venkateswaran Vivekananthan, and Sang-Jae Kim**

**Supplemental Information**

**Biodegradable Metal-Organic Framework MIL-88A for Triboelectric  
Nanogenerator**

Gaurav Khandelwal,<sup>1</sup> Nirmal Prashanth Maria Joseph Raj,<sup>1</sup> Vivekananthan Venkateswaran,<sup>1</sup>  
Sang-Jae Kim,<sup>1\*</sup>

<sup>1</sup>Nanomaterials and System Lab, Faculty of Applied Energy Systems, Major of Mechatronics  
Engineering, Jeju National University, Jeju 690-756, South Korea

---

\* Corresponding Author and Lead Contact, Email: [kimsangj@jeju.ac.kr](mailto:kimsangj@jeju.ac.kr)

## Transparent Methods

### Experimental

- 1. Materials:** Iron chloride hexahydrate ( $\text{FeCl}_3 \cdot 6\text{H}_2\text{O}$ ) and fumaric acid were purchased from Daejung Chemicals Ltd. (South Korea). Ethylcellulose (48% ethoxy content) was purchased from Acros organics (USA).
- 2. Synthesis of MIL-88A:** MIL-88A was synthesized using a procedure reported by Liao et al. (Liao et al., 2019). Briefly, 1.352 g of  $\text{FeCl}_3 \cdot 6\text{H}_2\text{O}$  and 0.580 g of fumaric acid was dissolved in 25 ml of deionized (DI) water. The solution was transferred to a Teflon-lined stainless-steel autoclave and placed at a temperature of 65 °C for 4 h. The product was collected and washed several times with DI water, followed by drying.
- 3. Device Fabrication:** The MIL-TENG was fabricated in a vertical contact-separation mode with an active area of 2.5 cm X 2.5 cm. MIL-88A was attached uniformly on a conducting adhesive aluminum tape (3M). The excess material was removed with the help of air gun. The MIL-88A attached Al tape was fixed on a polyethylene terephthalate (PET) substrate. The commercial FEP (50  $\mu\text{m}$ ) and Kapton (50  $\mu\text{m}$ ) films were directly attached to the aluminum tape followed by the PET substrate's attachment. The 10 wt% (1:4 ethanol: toluene) ethyl cellulose solution was spin-coated on the Al tape followed by the PET substrate's attachment. The copper wires were attached to the electrode using a silver paste for collecting output. Finally, the MIL-TENG was assembled by attaching the MIL-88A and opposite layers using a spacer.
- 4. Characterization:** The XRD measurements were performed using Malvern PANalytical Empyrean, with a generator voltage and tube current of 40 V and 30 mA, respectively. FT-IR measurements were taken on the Bruker Alpha II compact FT-IR spectrometer. The surface morphology image and EDS mapping were taken on Tescan MIRA-3 FE-SEM provided with Oxford EDS detector. The surface roughness analysis

was carried out using the NanoSystem NV2200 3D surface profiler. All the electrical measurements were performed under lab-made Faraday cage to reduce the noise. The force was applied using a LinMot Inc. linear motor. A Keithley 6514 electrometer was used to measure the voltage and charge of the MIL-TENG device. A Stanford Research SR570 low noise current preamplifier and Tektronix mixed domain oscilloscope MDO3000 series was used for the MIL-TENG device's current measurement. The trek 347 non-contact electrostatic voltmeter was used to measure the surface potential developed on MIL-88A.

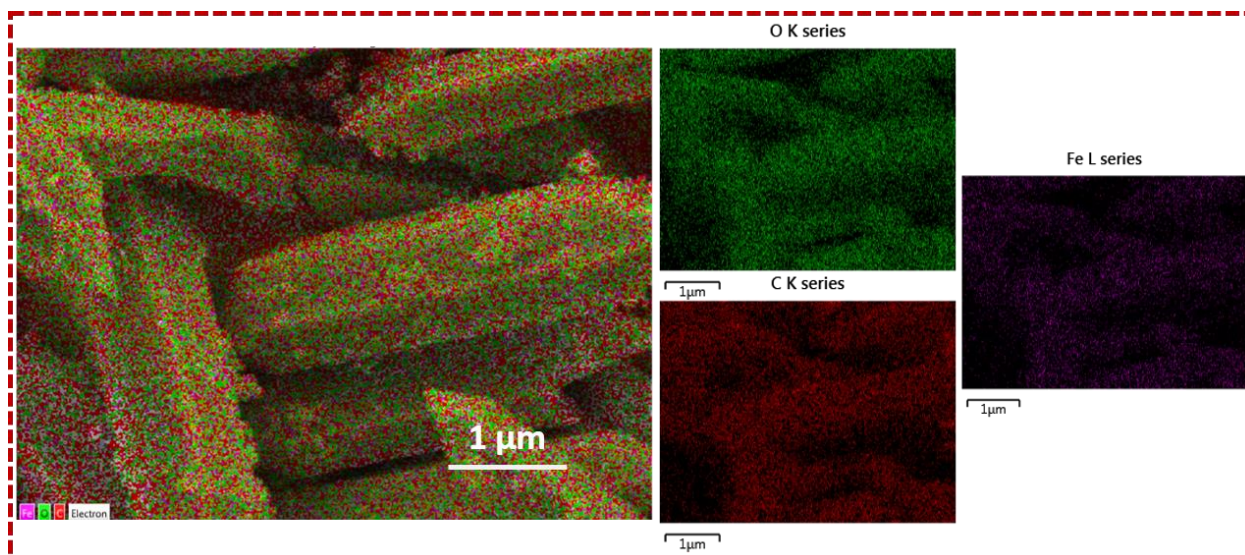

**Figure S1. EDS elemental mapping for MIL-88A. (Related to Figure 1).**

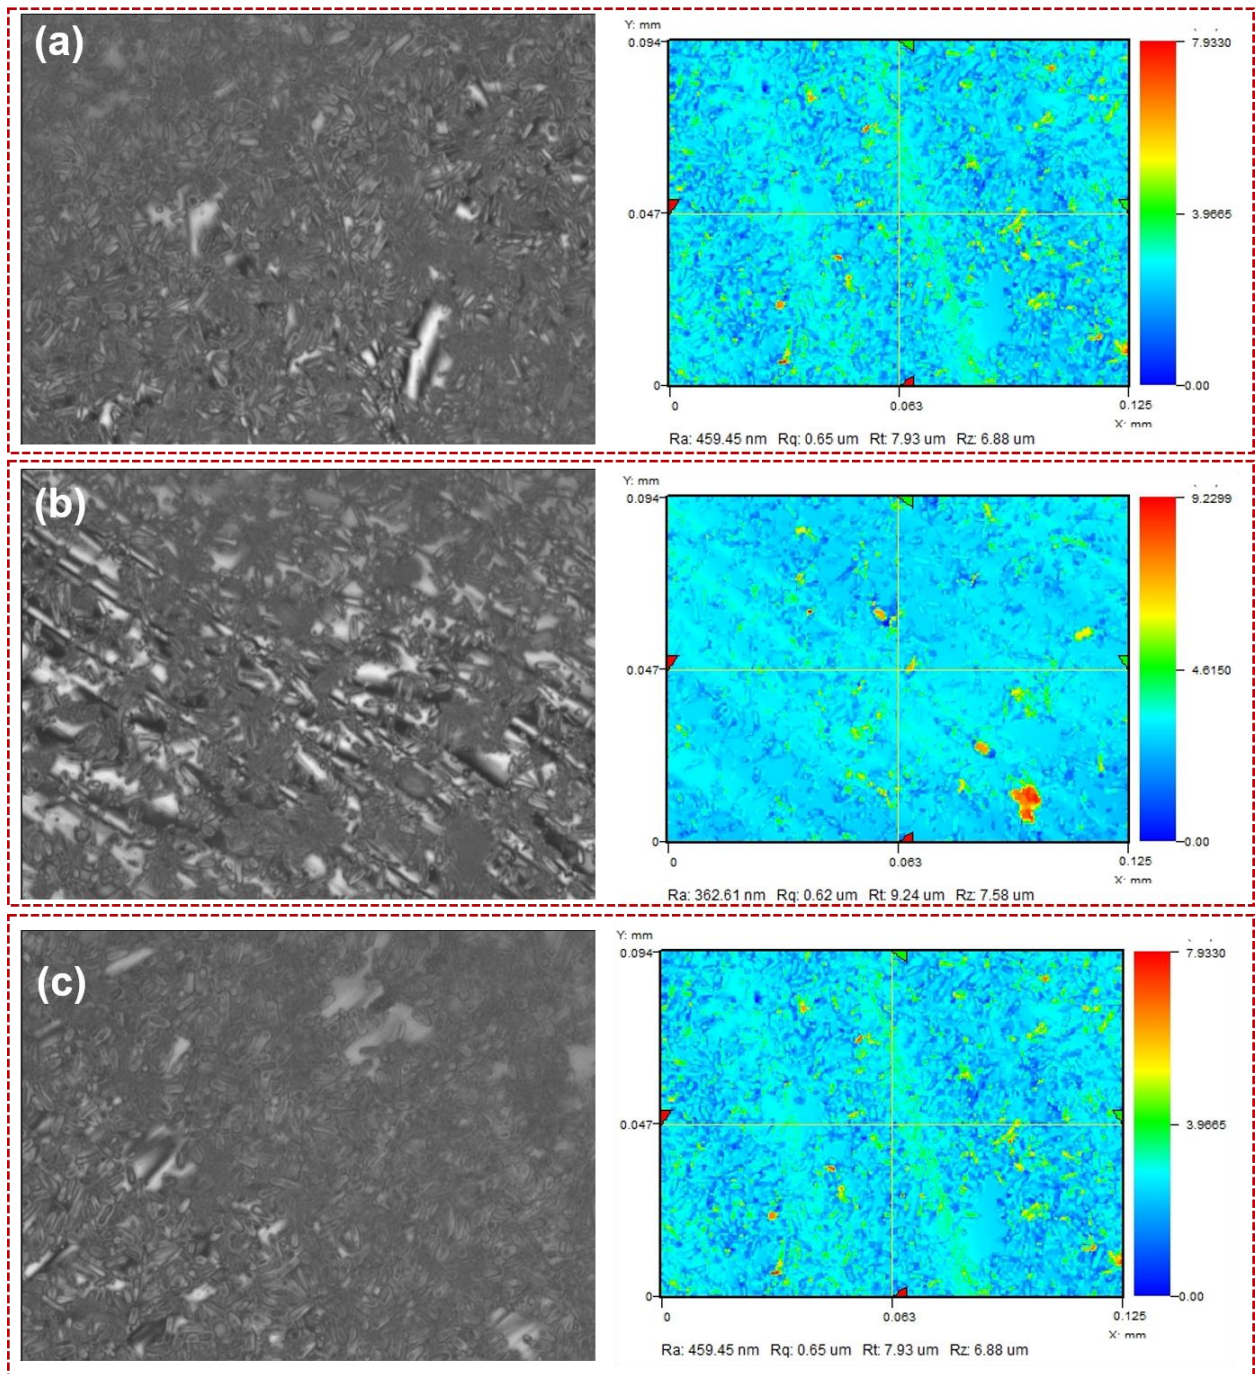

**Figure S2. The optical and 2D profile images of the dispersed samples (Related to Figure**

**1).**

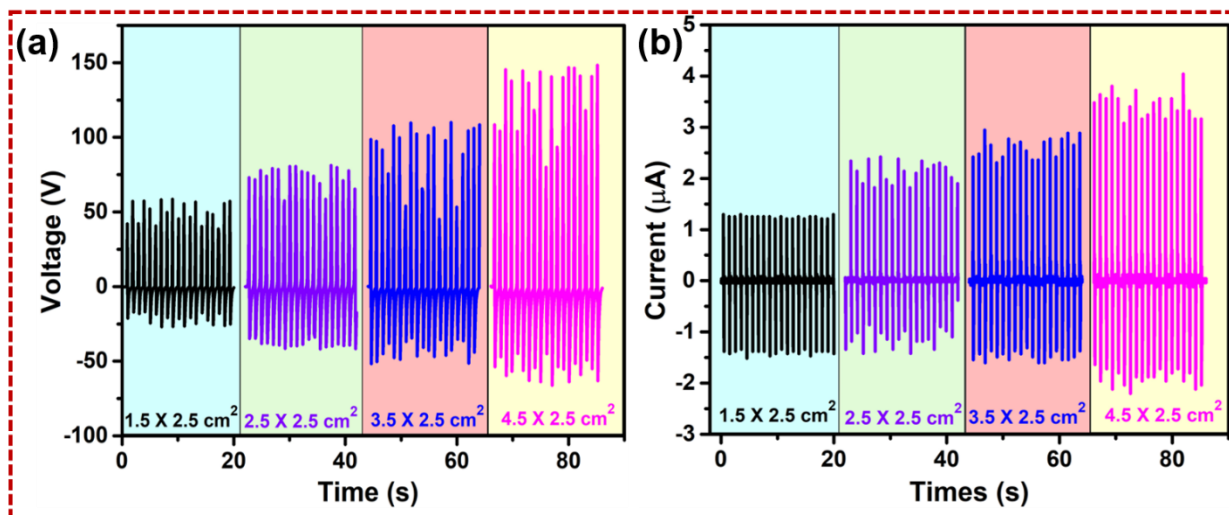

Figure S3. Voltage and current variation with the device size (Related to Figure 3).

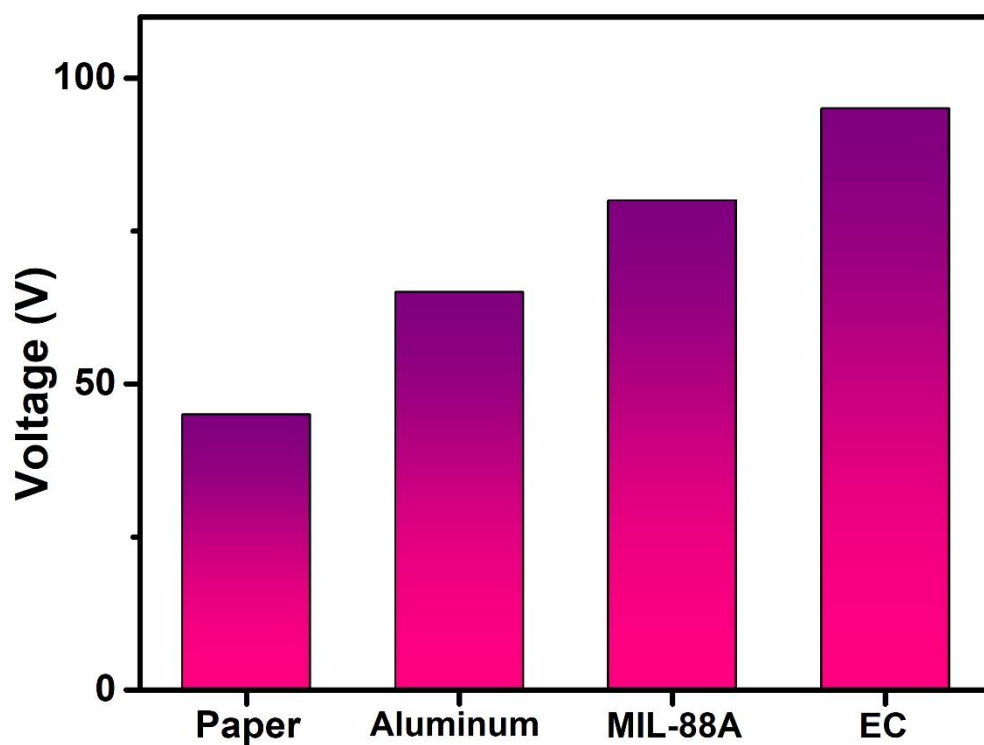

Figure S4. The comparison of voltage output generated by commonly used positive materials with MIL-88A (Related to Figure 3)

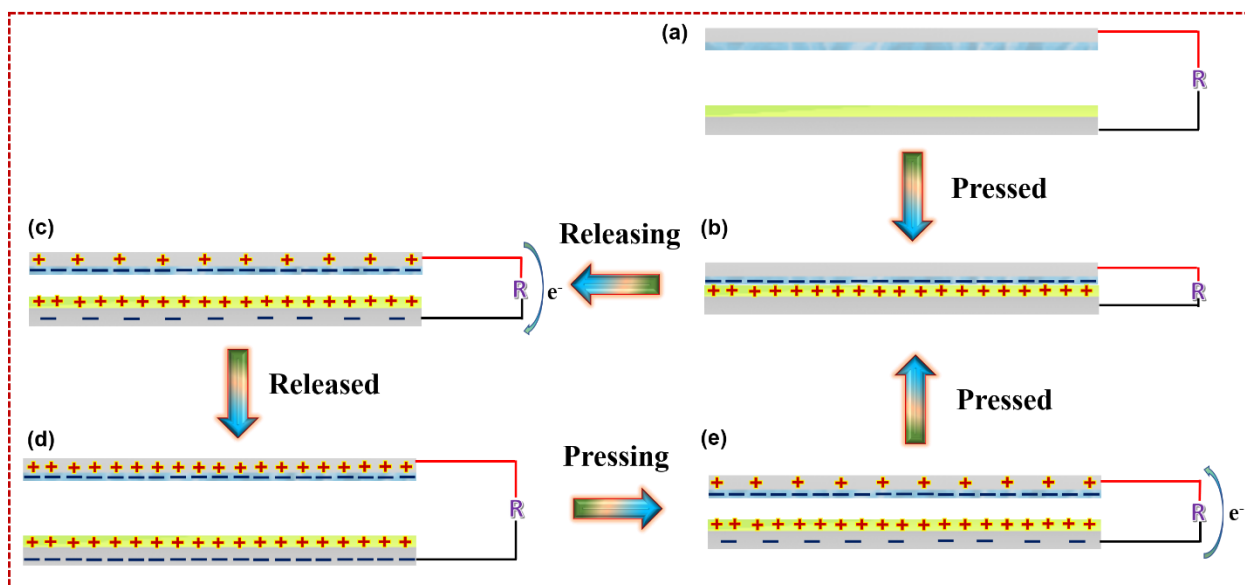

**Figure S5.** The schematic illustration of MIL-TENG working mechanism showing pressed, releasing, released and pressing conditions (Related to Figure 3).

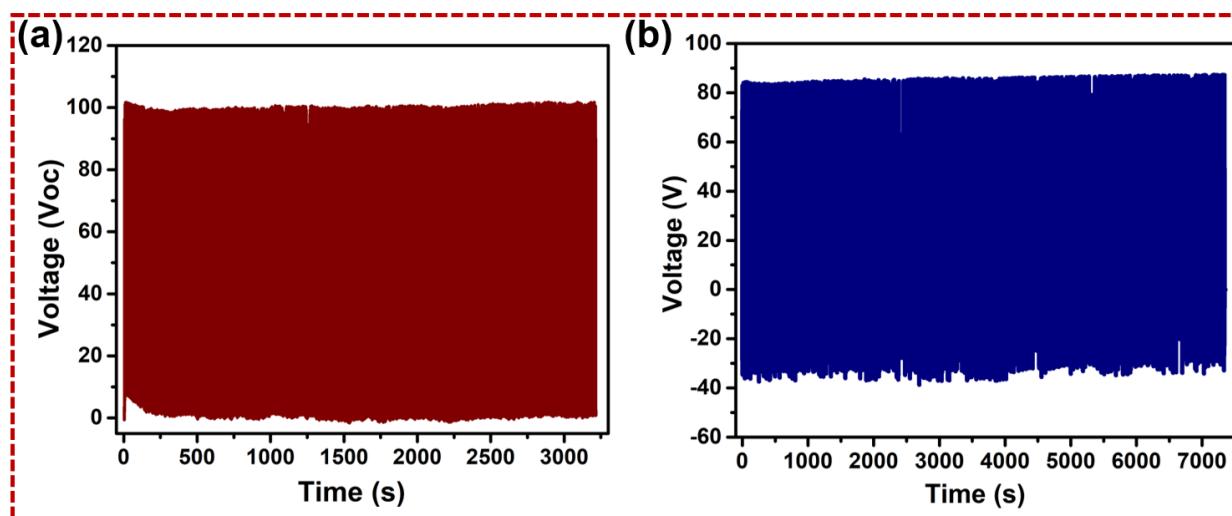

**Figure S6.** Stability of the device (Related to Figure 4).

(a) The stability of the open-circuit voltage and (b) long-term device stability.



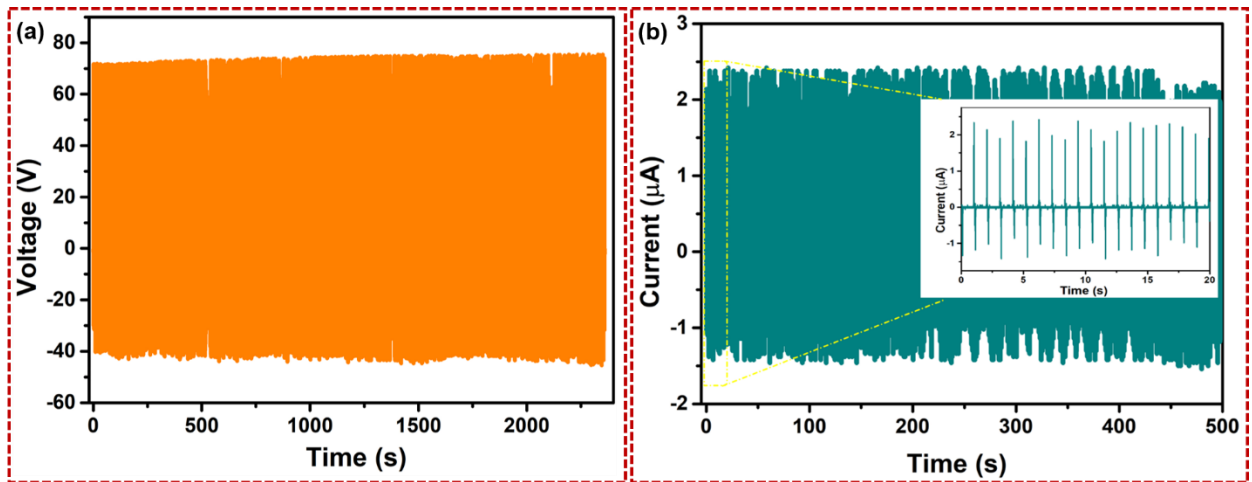

Figure S7. Voltage and current stability of MIL-TENG after 10 days (Related to Figure 4).

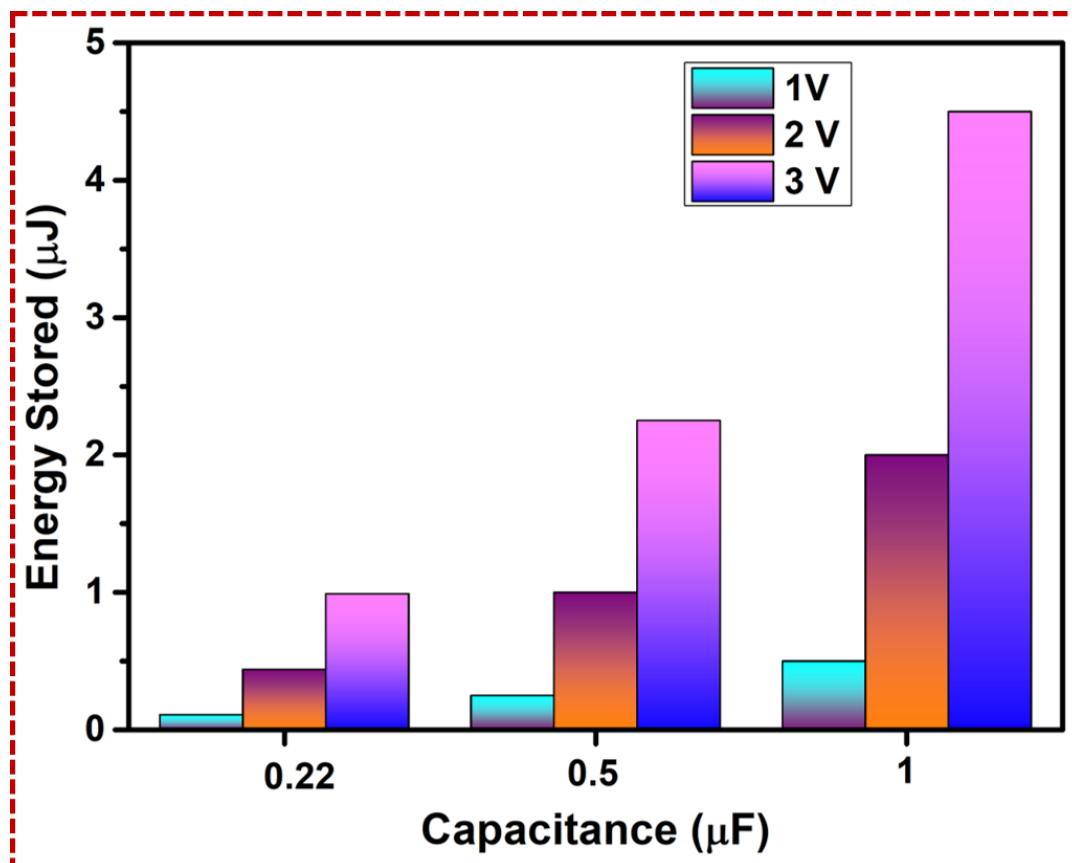

Figure S8. The energy stored in 0.22, 0.5 and 1 μF capacitor corresponding to 1, 2 and 3 V charging (Related to Figure 4).

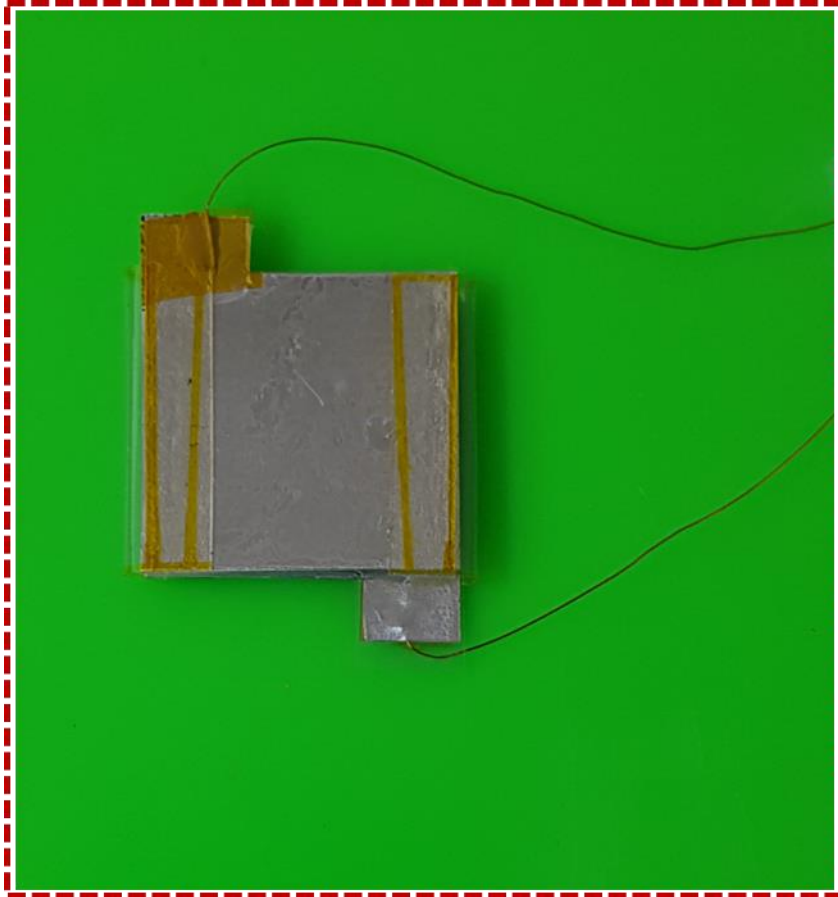

**Figure S9.** The image of the device used to power up the electronics via a capacitor  
(Related to Figure 5).

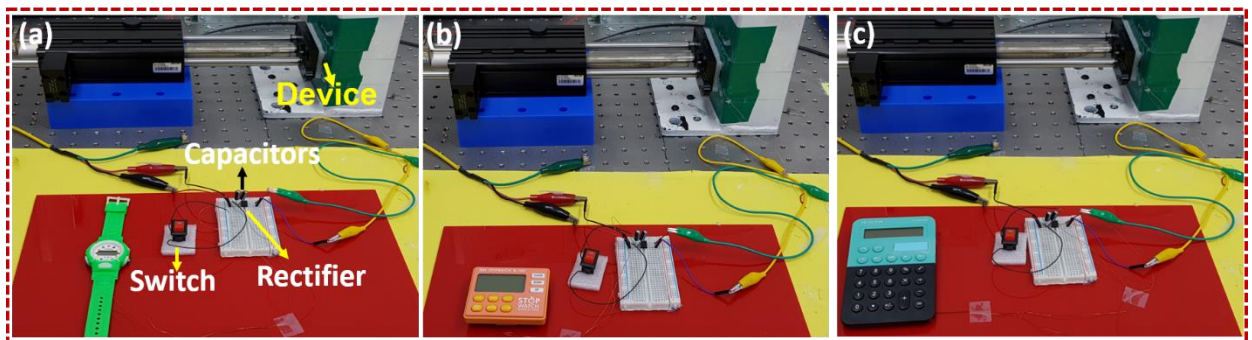

**Figure S10.** The detailed depiction of the electronics connected to the capacitor and rectifier (Related to Figure 5).

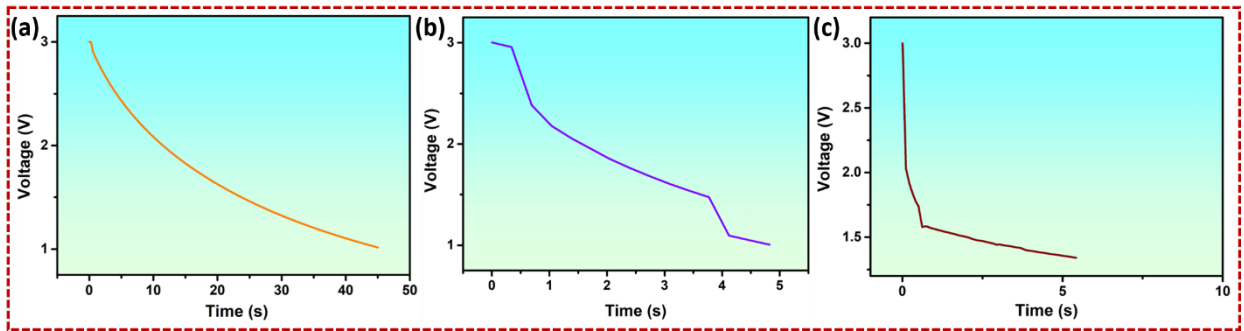

**Figure S11. The capacitor discharge signal after turning on the switch to power up the electronics (Related to Figure 5).**
